# Supplementary figures and images for: Deficiency for SAMHD1 activates MDA5 in a cGAS/STING-dependent manner
Source: PubMed Central journal article supplement — J Exp Med. 2022 Nov 8;220(1):e20220829. doi: 10.1084/jem.20220829 (PMC9648672; doi:10.1084/jem.20220829), 2022-11-08

Source data for Supplementary Figure S1B

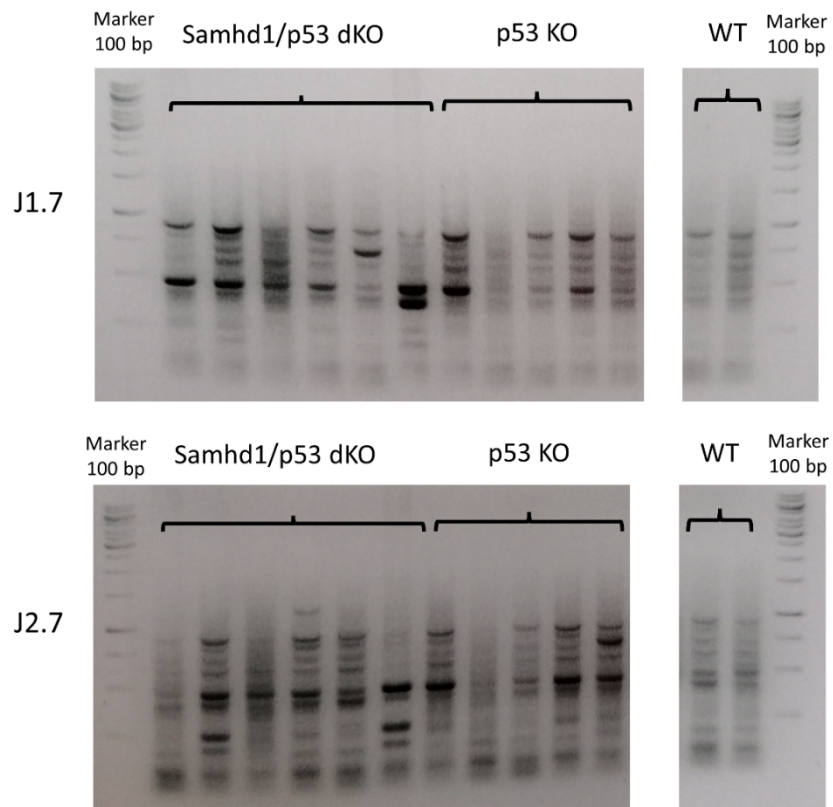

Supplement: JEM_20220829_SourceDataFS1.pdf [file JEM_20220829_SourceDataFS1.pdf]

Figure S2: exported virtual blot of the pATM WES analysis in SAMHD1-deficient MEFs.

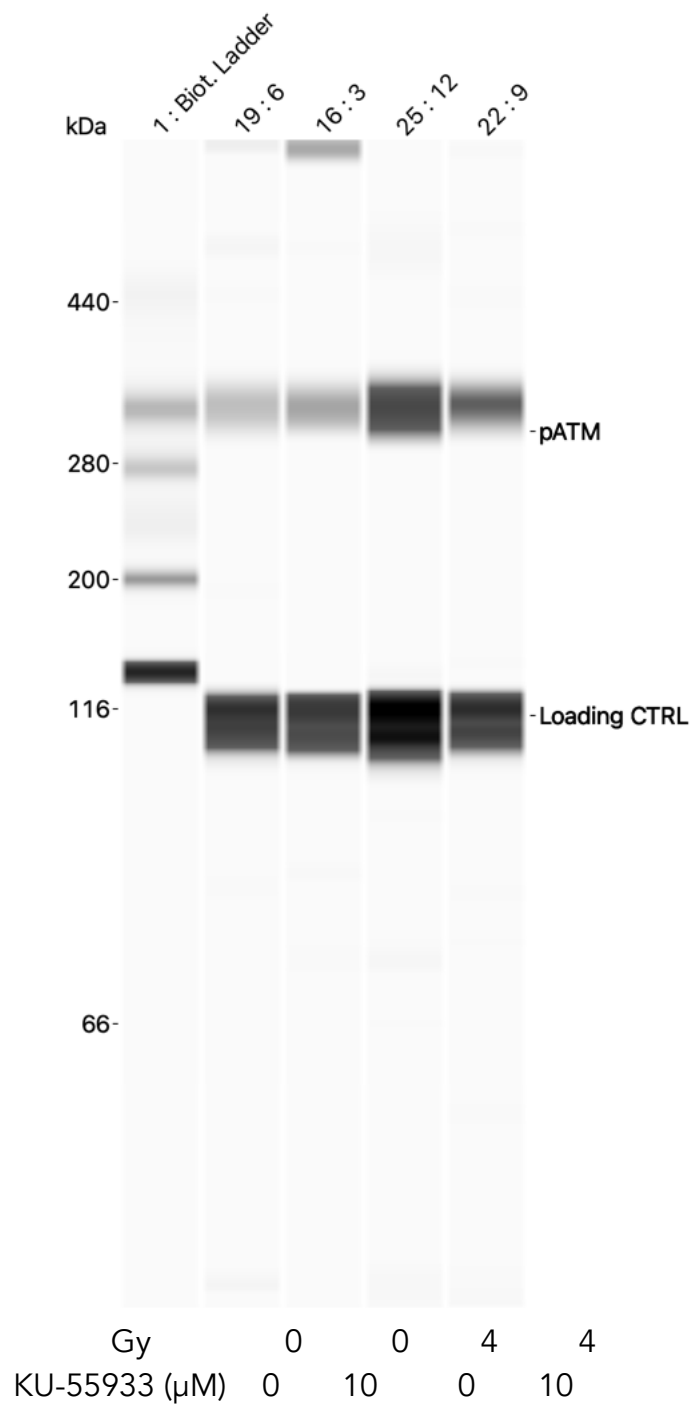

Supplement: JEM_20220829_SourceDataFS2.pdf [file JEM_20220829_SourceDataFS2.pdf]

Source Data Figure S4

S4A

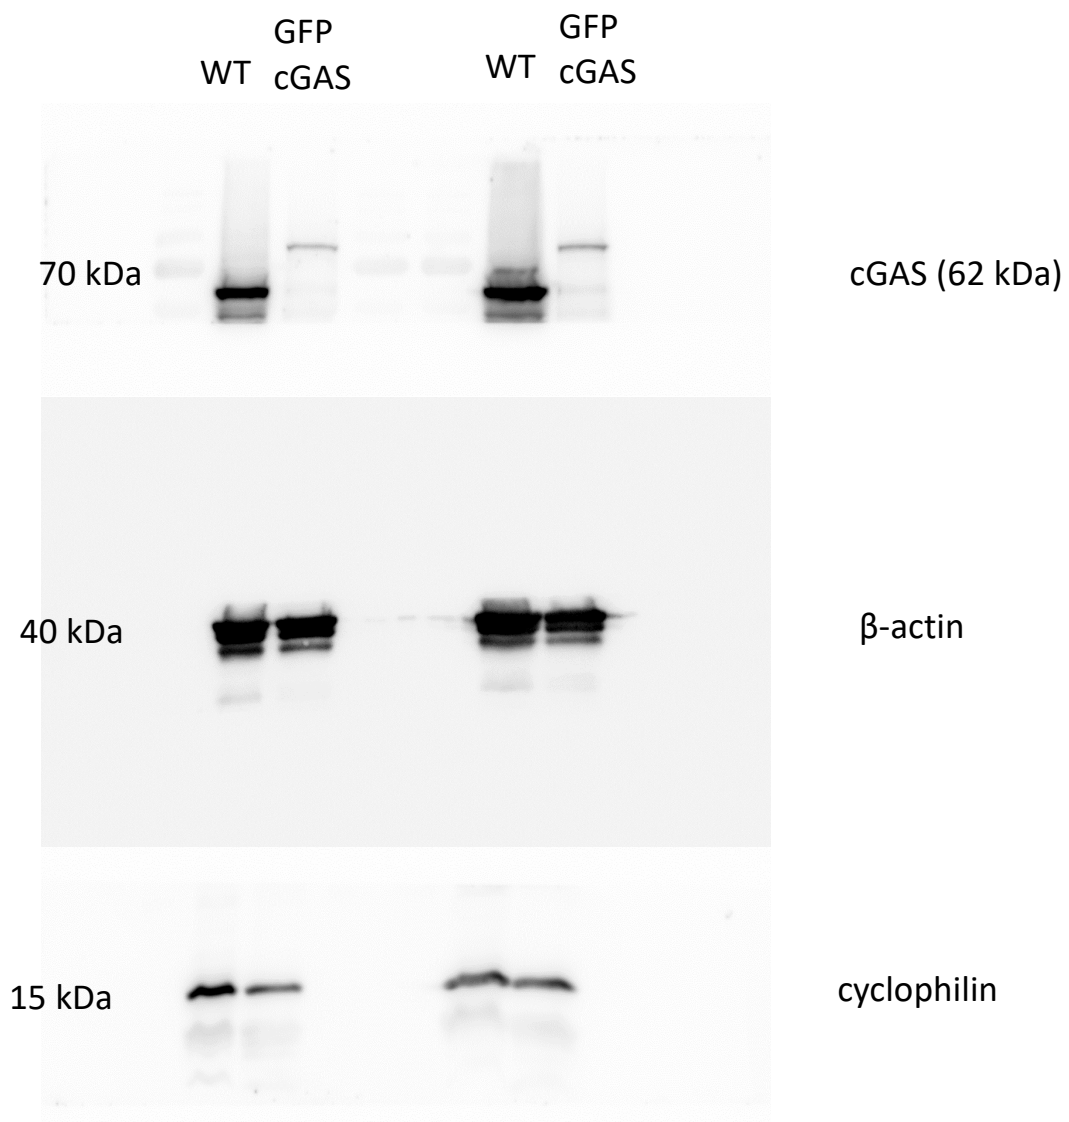

S4D

Supplement: JEM_20220829_SourceDataFS4.pdf [file JEM_20220829_SourceDataFS4.pdf]
